# Supplementary material for: A Study on the Transformer-CNN Imputation Method for Turbulent Heat Flux Dataset in the Qinghai-Tibet Plateau Grassland
Source: Copernicus journal article supplement (doi:10.5194/egusphere-2023-2685), 2024-01-08
Supplement: Supplementary file [file egusphere-2023-2685-AC2-supplement.pdf]

Dear Reviewer,

Thank you for your effort on review of my submission. Your comments and suggestions are helpful for my current submission and future research. Now, I respond to your comments item-by-item. Your comments in blue and my response in black.

1. The methodology is not described adequately. All the ML/DL models have several hyper-parameters that need to be carefully selected to develop an optimal model. For example, how many LSTM layers were used? How many neurons in each LSTM layer? What was the learning rate used? There is some randomness in the training of DL models; therefore, several models (8-10) are developed with different random seeds. Was this method adopted in the paper? I know that randomness can be quite significant at least for LSTMs. As another example, how were the widths determined in convolutional layers? These considerations are really important.

#### **LSTM:**

##### **Architecture-Related Hyperparameters**

Number of Channels in Convolutional Layer (128): The input convolutional layer is set to have 128 output channels. This number determines the amount of features the model can capture in the initial processing of input data. A higher number of channels can improve the model's ability to capture complex features.

Hidden State Size of LSTM Layer (64): The dimension of the hidden state for the LSTM layer is set to 64. This determines the capacity of LSTM units to remember information. For complex temporal data modeling tasks, choosing the appropriate size for the hidden state is key to balancing model complexity and performance.

Number of LSTM Layers (3): The LSTM is configured with 3 layers. Multiple LSTM layers can enhance the model's learning ability, especially for data with complex temporal dependencies, but this also significantly increases the number of model parameters and the difficulty of training.

Use of Bidirectional LSTM (bidirectional=True): Employing a bidirectional LSTM allows the model to learn both forward and backward dependencies in time series data, which has been proven beneficial in many time series analysis tasks, particularly in scenarios requiring capture of global temporal information.

##### **Training-Related Hyperparameters**

Dropout Ratios (0.15 and 0.3): Dropout is a regularization technique used to prevent over fitting by randomly dropping a portion of neural network nodes during training. In this model, two different dropout ratios are used to provide varying degrees of regularization across different network layers.

Non-linear Activation Functions between Linear and LSTM Layers (ReLU and GELU): ReLU and GELU activation functions are employed to introduce non-linearity, aiding the model in learning complex function mappings. GELU, compared to ReLU, can offer smoother gradients in certain cases, facilitating the learning process.

##### **Loss Functions**

MSELoss and SmoothL1Loss: These two loss functions are used for different outputs of the model. MSE (Mean Squared Error) loss is highly sensitive to outliers, while Smooth L1 loss is a combination of MSE and L1 losses, aimed at reducing the impact of outliers while maintaining

gradient stability. This combination is likely intended to balance model precision and robustness in predictions.

## **GRU:**

### **Architecture-Related Hyperparameters**

Number of Channels in Convolutional Layer (128): The convolutional layer's output channels are set to 128. This is because effective feature extraction is usually required before processing temporal data, and a higher number of channels helps the model capture a richer set of feature information. This is particularly important in dealing with complex turbulent heat flux data.

Hidden State Size of GRU Layer (64): The GRU (Gated Recurrent Unit) layer's hidden state size is set to 64, which determines the GRU unit's memory capacity when processing temporal data. Compared to LSTM, the GRU architecture is simpler and has fewer parameters but can still effectively capture long-term dependencies in time series.

Number of GRU Layers (3): The model includes three GRU layers. A multilayer structure helps learn more complex temporal features but also implies more parameters and a potential risk of over fitting.

Use of Bidirectional GRU (bidirectional=True): Similar to the bidirectional LSTM, bidirectional GRU can learn the dependencies of time series data both forward and backward, which is very useful for understanding the full context of the time series.

### **Training-Related Hyperparameters**

Dropout Ratios (0.15 and 0.3): Dropout regularization is applied in the model to reduce over fitting. Different levels of dropout ratios might be to increase the model's generalization capability while maintaining model complexity.

Non-linear Activation Functions Between Linear and GRU Layers (ReLU and GELU): The use of these activation functions aims to increase the model's non-linear capability, allowing it to learn more complex function mappings. GELU provides smooth gradients, aiding the optimization process, while ReLU is widely used for its computational efficiency.

### **Loss Functions**

MSELoss and SmoothL1Loss: These are used to assess the difference between the model's outputs and the target values. MSE loss is very sensitive to outliers, while Smooth L1 loss attempts to find a balance between the robustness of L1 loss and the efficiency of MSE loss. This combination is likely aimed at improving the model's accuracy and robustness in predicting turbulent heat flux data.

## **Transformer:**

### **Architecture-Related Hyperparameters**

Output Channels of Convolutional Layer (128): This parameter determines the number of features that the convolutional layer can capture. For simulating complex physical processes like turbulent heat flux, choosing a higher number of channels helps the model capture a richer set of feature information.

### **Transformer Block Configuration:**

Dimension (128): The dimension of the Transformer directly impacts the model's capacity to process information. Higher dimensions mean that the model can store and process more information internally, which is crucial for complex problems.

Dropout Rates (0.1, 0.25, and 0.5): Using different dropout rates in the Transformer module helps prevent over fitting while maintaining the model's ability to generalize data. Different dropout rates may be used to explore the model's performance under varying degrees of regularization.

Use of Layer Normalization (True): Layer normalization helps stabilize the training process and accelerate convergence, a common practice in Transformer models.

**Linear Layer Configuration:**

Input and Output Dimensions (128 to 128): These linear layers are used within the model to further process and transform features. Maintaining the same dimensions helps preserve the density of information flow, aiding in capturing complex relationships.

**Training-Related Hyperparameters**

Dropout Ratios (0.15, 0.3): Different levels of dropout ratios help the model mitigate the risk of over fitting while maintaining complexity. Selecting different rates might be based on experimental outcomes or aimed at adjusting the model's fit to the training data.

**Use of Loss Functions:**

MSELoss and SmoothL1Loss: These two loss functions are used for different outputs, aimed at balancing sensitivity to outliers and the smoothness of predictions. Using weighted loss functions can further adjust the model's focus on different types of samples.

The initial learning rate utilized in this study is set to 0.0005, configured at the beginning of the training loop as the lr variable. Subsequently, the paper employs a learning rate decay strategy to facilitate faster convergence and enhanced accuracy, whereby if  $\text{epoch} \% 6 == 0$  and  $\text{lr} \geq 0.000025$ , the learning rate is reduced by half. This implies that every six epochs, provided the current learning rate is greater than or equal to 0.000025, the learning rate will be updated to half its present value, thus implementing learning rate decay.

Regarding the treatment of randomness, measures have indeed been implemented within the code to establish a random seed, thereby ensuring the reproducibility of experiments. Specifically, the random seed is set using the `setup_seed(seed)` function, affecting the randomness in PyTorch, Numpy, and CUDA. Setting a random seed guarantees that each execution of the code will consistently result in identical outcomes for random operations such as initial weight initialization and dataset splitting.

In the early stages of model development, the selection of convolutional kernels was informed by the 2020 article "Character-Level Translation with Self-attention," which explores the effects of integrating convolution operations within a Transformer for character-level neural translation. Inspired by this study, this paper considers employing kernels of sizes 3, 5, and 7 to capture multi-scale features. In the simulation of turbulent heat flux, turbulence phenomena display distinct characteristics at various spatial scales. Smaller kernels (such as 3) can capture more localized features, while larger kernels (such as 5 and 7) are able to cover a wider area, capturing more global features. This combination enables the model to concurrently learn features across different scales, thereby enhancing the model's understanding and predictive capacity regarding changes in turbulent heat flux.

2. RF has been used for feature selection. Why? If there are some redundant features, those would be taken care of by the ML/DL algorithms except the KNN method. Also, why not include RF as one of the ML algorithms to impute the H and L values? RF is surely better than the KNN method. Also, note that RF can be thought of as an adaptive KNN so it seems better to use RF than KNN.

In the simulation of turbulent heat flux within deep learning models, employing Random Forest for feature selection is grounded in its capacity to efficiently reduce dimensionality and enhance model training efficiency. Random Forest assesses the importance of features, pinpointing those that most significantly affect model performance, thereby decreasing the quantity of features the model must process and boosting training velocity. Simultaneously, by removing insignificant or redundant features, Random Forest aids in alleviating the risk of model over fitting and

strengthens the model's generalization ability on unseen data. Moreover, it not only facilitates feature selection but also quantifies the contribution of each feature to the model's predictive performance, deepening our comprehension of the model's decision-making process. Therefore, although machine learning and deep learning algorithms can handle a degree of feature redundancy, the application of Random Forest in feature selection remains an effective and beneficial strategy, optimizing model input features, enhancing performance, and interpretability. Given that this paper principally aims to investigate the imputation effects of deep learning techniques on turbulent heat flux, it does not encompass all machine learning methods. If necessary, this methodology could be supplemented in subsequent research.

3. The driving variables in this study also had missing values which were imputed using the KNN method. First of all, the accuracy of the KNN method in imputing these driving variables need to be established. Second, why not try other methods such as random forest for imputing the driving variables? Also, why select 3 nearest neighbors? Were other combinations tried? The method to compute distance in the KNN approach has not been described either.

This study opts to employ the K-Nearest Neighbors (K-NN) method for imputing missing data in environmental drivers, with one significant advantage of K-NN being its distance-based weighting mechanism. This allows observations closer in feature space to exert a greater influence on the imputation outcome, enabling more accurate prediction of missing values—an advantage not shared by Random Forest. The choice of 3 as the number of neighbors is grounded in the fact that a smaller number of neighbors can reduce computational complexity and enhance the efficiency of imputation while maintaining accuracy. This method strikes a balance between imputation quality and computational efficiency of the algorithm, making it both practical and efficient for handling missing environmental driver data.

Various distance calculation methods are available within the K-NN algorithm, commonly including:

**Euclidean Distance:** The most frequently used distance metric, calculated as the square root of the sum of the squared differences between dimensions. It is suitable for numerical data.

**Manhattan Distance:** Calculates the sum of the absolute differences between points in a standard coordinate system. It is applicable to grid layout path planning and scenarios where differences in each dimension are equally important.

**Chebyshev Distance:** The distance between two points is defined as the maximum value among their coordinate differences. It is suitable for situations where the most extreme difference needs to be considered.

The choice of distance metric in K-NN depends on the data type and application context. For environmental drivers of turbulent heat flux measured over time scales, and where the primary concern is the distance between time points, Euclidean distance is an apt choice.

In this study, by setting the weights="distance" parameter, the KNN imputation (KNNImputer) utilizes a weighted Euclidean distance formula for calculation. This means that for each missing value, the algorithm identifies the nearest "n\_neighbors" (3 neighbors) and uses their values, weighting them by the inverse of their distances to the point of imputation to estimate missing values.

The weighted Euclidean distance formula is used to calculate the distance between two points, taking into account the importance or weight of each dimension. Given two points  $P = (p_1, p_2, \dots, p_n)$  and  $Q = (q_1, q_2, \dots, q_n)$ , along with weights for each dimension  $W = (w_1, w_2, \dots, w_n)$ , the weighted Euclidean distance  $d_w(P, Q)$  is defined as:

$$d_w(P, Q) = \sqrt{w_1(p_1 - q_1)^2 + w_2(p_2 - q_2)^2 + \dots + w_n(p_n - q_n)^2}$$

When using the weights="distance" parameter in KNNImputer, weights are calculated based on the inverse of the distance between points. Here,  $W_i$  represents the weight for the  $i^{\text{th}}$  dimension. In the context of time series imputation with KNN, weighting typically refers to weighting each neighbor's contribution according to the distance, rather than applying weights directly in the distance formula. For each missing value, the imputed value is calculated based on the values of the nearest neighbors, where the contribution of each neighbor is weighted by the inverse of their distance to the missing data point, meaning shorter distances contribute more heavily. This indicates that specific weights are dynamically calculated based on the actual distances between data points, rather than being pre-specified.

4. The methodology for testing the different DL/ML methods is not rigorous enough. A total of 10 years of data are used where 9 years of the data are used for training and 1 year (year 2012) is used for testing. This methodology should be repeated for each year as the testing year in iteration. Basically, use the data from 2007 as the test data and rest of the data for training. Then, used 2008 as testing year and rest as training, and so on.

First and foremost, I would like to express my sincere gratitude for your insightful comments and suggestions regarding our manuscript. Your recommendation to iteratively use each year as the test set, thereby ensuring that each year from 2007 to 2016 serves once as the test data with the remaining years allocated for training, is indeed recognized as a rolling forecasting origin or time series cross-validation. This approach provides a comprehensive understanding of the model's performance over time and its generalizability across different temporal conditions. However, I wish to explain the constraints that led to our initial methodological choice. The primary reason for not adopting the suggested iterative annual testing approach from the outset was the substantial increase in computational load it entails, which also contributed to the slower response time. We have now completed the iterative validation of simulating turbulent heat flux data over a decade.

The results indicate that, except for underperforming slightly in comparison to the Transformer model in 2016, the Transformer\_CNN model emerged as the best model for simulating turbulent heat flux in all other years, further validating the effectiveness of Transformer\_CNN as a viable tool for imputing turbulent heat flux data.

2007

| Sets    | H        |       |            |       |       |       | LE           |       |            |       |       |       |
|---------|----------|-------|------------|-------|-------|-------|--------------|-------|------------|-------|-------|-------|
|         | Training |       | Validation |       | Test  |       | Training     |       | Validation |       | Test  |       |
|         | RMSE     | MAE   | RMSE       | MAE   | RMES  | MAE   | RMSE         | MAE   | RMSE       | MAE   | RMES  | MAE   |
| SVM     | 20.61    | 2.521 | 24.88      | 3.443 | 27.68 | 4.145 | 26.32        | 3.093 | 21.12      | 3.174 | 19.98 | 3.693 |
| KNN     | 22.37    | 3.546 | 24.20      | 3.864 | 30.67 | 4.421 | 18.49        | 2.961 | 19.55      | 2.377 | 20.91 | 3.315 |
| XGBoost | 28.64    | 4.644 | 29.85      | 4.841 | 31.28 | 4.929 | 19.85        | 3.044 | 20.77      | 3.087 | 25.13 | 3.944 |
| LSTM    | 23.18    | 3.451 | 25.99      | 4.018 | 29.17 | 4.547 | 17.98        | 3.348 | 21.47      | 3.571 | 24.22 | 3.816 |
| GRU     | 22.15    | 3.051 | 22.57      | 3.244 | 26.37 | 3.968 | <b>17.55</b> | 2.257 | 20.91      | 2.753 | 23.35 | 3.646 |

|                 |              |              |              |              |              |              |       |              |              |              |              |              |
|-----------------|--------------|--------------|--------------|--------------|--------------|--------------|-------|--------------|--------------|--------------|--------------|--------------|
| Transformer     | 19.53        | 2.848        | 20.07        | <b>3.056</b> | 23.29        | 3.433        | 18.67 | 2.978        | 19.37        | 3.145        | 19.24        | 3.118        |
| Transformer_CNN | <b>15.67</b> | <b>2.476</b> | <b>17.57</b> | 3.168        | <b>20.87</b> | <b>3.355</b> | 17.62 | <b>2.946</b> | <b>18.39</b> | <b>2.876</b> | <b>18.95</b> | <b>2.993</b> |

2008

| Sets            | H            |              |              |              |              |              | LE           |              |              |              |              |              |
|-----------------|--------------|--------------|--------------|--------------|--------------|--------------|--------------|--------------|--------------|--------------|--------------|--------------|
|                 | Training     |              | Validation   |              | Test         |              | Training     |              | Validation   |              | Test         |              |
|                 | RMSE         | MAE          | RMSE         | MAE          | RMES         | MAE          | RMSE         | MAE          | RMSE         | MAE          | RMES         | MAE          |
| SVM             | 20.46        | 2.942        | 21.69        | 3.056        | 27.89        | 3.662        | 26.88        | 3.461        | 29.15        | 3.841        | 30.75        | 4.025        |
| KNN             | 21.44        | 3.018        | 22.87        | 3.246        | 26.35        | 3.428        | 23.18        | 3.143        | 24.85        | 3.386        | 28.54        | 3.757        |
| XGBoost         | 21.38        | 3.007        | 24.91        | 3.582        | 27.16        | 3.659        | 23.55        | 3.277        | 25.55        | 3.568        | 29.33        | 3.954        |
| LSTM            | 22.63        | 3.144        | 25.75        | 3.458        | 28.33        | 3.881        | 20.86        | 3.155        | 23.91        | 3.347        | 25.88        | 3.552        |
| GRU             | 20.44        | 2.988        | 23.24        | 3.528        | 26.99        | 3.699        | 19.71        | 3.048        | 23.45        | 3.257        | 24.13        | 3.848        |
| Transformer     | 15.77        | <b>2.544</b> | 18.62        | 2.876        | 23.47        | 3.258        | 19.15        | 2.883        | <b>19.10</b> | <b>3.079</b> | 19.57        | 3.130        |
| Transformer_CNN | <b>14.84</b> | 2.668        | <b>17.88</b> | <b>2.759</b> | <b>21.83</b> | <b>2.954</b> | <b>18.18</b> | <b>2.784</b> | 20.25        | 3.092        | <b>18.47</b> | <b>2.836</b> |

2009

| Sets            | H            |              |              |              |              |              | LE           |              |              |              |              |              |
|-----------------|--------------|--------------|--------------|--------------|--------------|--------------|--------------|--------------|--------------|--------------|--------------|--------------|
|                 | Training     |              | Validation   |              | Test         |              | Training     |              | Validation   |              | Test         |              |
|                 | RMSE         | MAE          | RMSE         | MAE          | RMES         | MAE          | RMSE         | MAE          | RMSE         | MAE          | RMES         | MAE          |
| SVM             | 19.71        | 3.456        | 20.29        | 3.60         | 27.49        | 3.955        | 24.89        | 3.062        | 25.76        | 3.284        | 29.24        | 3.856        |
| KNN             | 21.75        | 3.701        | 26.15        | 3.641        | 32.12        | 4.112        | 25.34        | 3.277        | 28.62        | 3.577        | 30.65        | 3.888        |
| XGBoost         | 26.39        | 3.666        | 25.22        | 4.419        | 29.18        | 4.906        | 23.51        | 2.983        | 24.57        | 3.147        | 28.36        | 3.743        |
| LSTM            | 25.77        | 3.451        | 25.43        | 4.183        | 29.10        | 4.752        | 24.19        | 3.248        | 26.47        | 3.335        | 29.09        | 3.842        |
| GRU             | 22.16        | 3.091        | 22.62        | 4.017        | 28.24        | 4.218        | 22.64        | 2.889        | 24.81        | 3.053        | 27.55        | 3.257        |
| Transformer     | <b>17.25</b> | <b>2.973</b> | <b>18.22</b> | 3.279        | 24.87        | 3.495        | <b>19.80</b> | <b>2.459</b> | 23.51        | 3.018        | 24.87        | 3.266        |
| Transformer_CNN | 18.77        | 3.025        | 19.24        | <b>3.246</b> | <b>23.16</b> | <b>3.357</b> | 20.54        | 2.687        | <b>22.76</b> | <b>2.928</b> | <b>21.38</b> | <b>3.006</b> |

2010

| Sets | H        |       |            |       |       |       | LE       |       |            |       |       |       |
|------|----------|-------|------------|-------|-------|-------|----------|-------|------------|-------|-------|-------|
|      | Training |       | Validation |       | Test  |       | Training |       | Validation |       | Test  |       |
|      | RMSE     | MAE   | RMSE       | MAE   | RMES  | MAE   | RMSE     | MAE   | RMSE       | MAE   | RMES  | MAE   |
| SVM  | 22.68    | 2.951 | 23.95      | 3.681 | 25.44 | 3.870 | 24.18    | 4.196 | 25.20      | 4.174 | 26.23 | 4.451 |

|                 |              |              |              |              |              |              |              |              |              |              |              |              |
|-----------------|--------------|--------------|--------------|--------------|--------------|--------------|--------------|--------------|--------------|--------------|--------------|--------------|
| KNN             | 18.29        | 2.981        | 20.01        | 3.665        | 21.03        | 3.882        | 23.23        | 3.941        | 24.35        | 4.267        | 26.11        | 4.440        |
| XGBoost         | 16.33        | 3.227        | 19.43        | 3.970        | 21.51        | 3.940        | 19.35        | 2.946        | 23.14        | 3.781        | 25.49        | 4.002        |
| LSTM            | 19.84        | 2.904        | 20.86        | 3.696        | 23.31        | 3.373        | 22.94        | 3.761        | 23.71        | 3.928        | 27.09        | 4.927        |
| GRU             | 18.26        | 3.621        | 19.81        | 3.340        | 22.14        | 3.400        | 18.26        | 2.843        | 20.95        | 3.039        | 24.01        | 3.588        |
| Transformer     | <b>17.37</b> | <b>3.047</b> | 19.37        | <b>3.641</b> | 20.26        | 3.944        | 19.16        | 3.038        | 21.75        | 3.254        | 22.64        | 3.337        |
| Transformer_CNN | 17.56        | 3.108        | <b>18.84</b> | 3.884        | <b>19.38</b> | <b>3.250</b> | <b>18.42</b> | <b>2.925</b> | <b>19.59</b> | <b>3.004</b> | <b>20.68</b> | <b>3.209</b> |

2011

| Sets            | H            |              |              |              |              |              | LE           |              |              |              |              |              |
|-----------------|--------------|--------------|--------------|--------------|--------------|--------------|--------------|--------------|--------------|--------------|--------------|--------------|
|                 | Training     |              | Validation   |              | Test         |              | Training     |              | Validation   |              | Test         |              |
|                 | RMSE         | MAE          | RMSE         | MAE          | RMES         | MAE          | RMSE         | MAE          | RMSE         | MAE          | RMES         | MAE          |
| SVM             | 19.39        | 3.764        | 20.366       | 3.900        | 26.14        | 4.142        | 21.21        | 3.441        | 21.96        | 3.682        | 22.45        | 3.870        |
| KNN             | 21.48        | 3.634        | 25.95        | 3.788        | 31.49        | 4.189        | 20.28        | 3.367        | 23.87        | 4.061        | 25.03        | 3.880        |
| XGBoost         | 26.30        | 4.089        | 25.83        | 3.912        | 29.49        | 4.498        | 16.33        | 3.227        | 19.43        | 3.870        | 17.35        | 3.594        |
| LSTM            | 25.96        | 3.102        | 24.68        | 4.266        | 29.33        | 4.553        | 19.84        | 2.900        | 20.87        | 3.196        | 21.31        | 3.373        |
| GRU             | 22.60        | 3.593        | 21.77        | 3.447        | 27.24        | 4.513        | 18.27        | 2.862        | 22.43        | 4.057        | 20.47        | 4.115        |
| Transformer     | 17.53        | 2.887        | 19.07        | 3.817        | 24.71        | 4.016        | 18.75        | 3.620        | 19.81        | 3.340        | 20.68        | 3.644        |
| Transformer_CNN | <b>17.13</b> | <b>2.519</b> | <b>18.74</b> | <b>3.625</b> | <b>24.66</b> | <b>3.778</b> | <b>18.50</b> | <b>3.312</b> | <b>19.52</b> | <b>2.921</b> | <b>19.35</b> | <b>3.267</b> |

2013

| Sets            | H            |              |              |              |              |              | LE           |              |              |              |              |              |
|-----------------|--------------|--------------|--------------|--------------|--------------|--------------|--------------|--------------|--------------|--------------|--------------|--------------|
|                 | Training     |              | Validation   |              | Test         |              | Training     |              | Validation   |              | Test         |              |
|                 | RMSE         | MAE          | RMSE         | MAE          | RMES         | MAE          | RMSE         | MAE          | RMSE         | MAE          | RMES         | MAE          |
| SVM             | 18.27        | 2.736        | 20.15        | 3.043        | 26.89        | 3.746        | 23.67        | 2.754        | 24.76        | 3.062        | 19.79        | 3.124        |
| KNN             | 19.61        | 3.034        | 22.14        | 3.176        | 25.73        | 3.519        | 24.16        | 2.972        | 27.43        | 5.265        | 29.27        | 5.477        |
| XGBoost         | 21.23        | 3.248        | 23.86        | 3.394        | 25.16        | 4.061        | 18.29        | 3.014        | 19.27        | 3.091        | 19.04        | 2.943        |
| LSTM            | 23.34        | 3.432        | 23.97        | 3.609        | 27.38        | 4.483        | 23.14        | 3.207        | 24.12        | 3.346        | 26.47        | 4.573        |
| GRU             | 22.18        | 3.374        | 22.94        | 3.457        | 24.93        | 3.685        | 19.25        | 3.216        | 19.99        | 3.265        | 21.84        | 3.597        |
| Transformer     | 17.43        | 2.831        | 18.47        | 2.929        | 20.48        | 3.462        | <b>16.08</b> | <b>2.462</b> | 18.24        | 2.857        | 17.49        | 2.963        |
| Transformer_CNN | <b>14.25</b> | <b>2.472</b> | <b>16.88</b> | <b>2.746</b> | <b>18.43</b> | <b>3.154</b> | 17.76        | 2.564        | <b>18.09</b> | <b>2.681</b> | <b>17.35</b> | <b>2.869</b> |

2014

| Sets                    | H            |              |              |              |              |              | LE           |              |              |              |              |              |
|-------------------------|--------------|--------------|--------------|--------------|--------------|--------------|--------------|--------------|--------------|--------------|--------------|--------------|
|                         | Training     |              | Validation   |              | Test         |              | Training     |              | Validation   |              | Test         |              |
|                         | RMSE         | MAE          | RMSE         | MAE          | RMES         | MAE          | RMSE         | MAE          | RMSE         | MAE          | RMES         | MAE          |
| SVM                     | 19.84        | 3.519        | 21.65        | 3.735        | 25.36        | 4.357        | 23.17        | 3.493        | 24.64        | 3.874        | 28.14        | 4.637        |
| KNN                     | 22.38        | 4.357        | 24.66        | 4.561        | 31.48        | 6.05         | 24.38        | 3.627        | 26.07        | 4.036        | 29.21        | 5.143        |
| XGBoost                 | 23.32        | 4.534        | 25.49        | 4.851        | 28.28        | 5.568        | 20.64        | 3.183        | 21.28        | 3.436        | 24.24        | 4.324        |
| LSTM                    | 23.83        | 4.647        | 25.26        | 4.435        | 27.73        | 4.969        | 24.37        | 3.846        | 25.72        | 4.041        | 26.37        | 4.235        |
| GRU                     | 23.08        | 4.342        | 23.75        | 4.624        | 26.87        | 4.867        | 20.34        | 3.068        | 21.26        | 3.264        | 25.84        | 4.027        |
| Transformer             | 17.48        | 2.531        | 17.68        | 2.634        | 22.43        | 3.267        | 16.24        | 2.637        | 18.68        | 2.943        | 21.36        | 3.489        |
| Transformer_CNN<br>2015 | <b>17.17</b> | <b>2.343</b> | <b>17.50</b> | <b>2.353</b> | <b>22.41</b> | <b>2.999</b> | <b>15.96</b> | <b>2.426</b> | <b>18.53</b> | <b>2.554</b> | <b>21.02</b> | <b>3.224</b> |

| Sets                    | H            |              |              |              |              |              | LE           |              |              |              |              |              |
|-------------------------|--------------|--------------|--------------|--------------|--------------|--------------|--------------|--------------|--------------|--------------|--------------|--------------|
|                         | Training     |              | Validation   |              | Test         |              | Training     |              | Validation   |              | Test         |              |
|                         | RMSE         | MAE          | RMSE         | MAE          | RMES         | MAE          | RMSE         | MAE          | RMSE         | MAE          | RMES         | MAE          |
| SVM                     | 19.32        | 2.784        | 19.98        | 2.949        | 26.61        | 3.155        | 25.09        | 4.215        | 26.24        | 4.342        | 28.69        | 4.524        |
| KNN                     | 23.16        | 3.075        | 26.78        | 4.211        | 32.52        | 4.517        | 20.56        | 3.192        | 22.75        | 3.487        | 26.71        | 4.365        |
| XGBoost                 | 24.38        | 3.227        | 25.07        | 3.439        | 28.14        | 3.958        | 19.27        | 3.062        | 23.54        | 3.679        | 24.75        | 3.934        |
| LSTM                    | 24.26        | 3.106        | 25.17        | 3.548        | 29.57        | 4.352        | 24.43        | 2.859        | 24.57        | 4.254        | 28.76        | 3.942        |
| GRU                     | 22.10        | 3.081        | 23.54        | 3.349        | 27.53        | 4.254        | 21.59        | 2.818        | 21.76        | 3.857        | 25.49        | 3.751        |
| Transformer             | 17.75        | <b>2.719</b> | 19.34        | <b>2.964</b> | 25.48        | 3.867        | 19.34        | <b>2.963</b> | 21.27        | 3.685        | 22.57        | 3.841        |
| Transformer_CNN<br>2016 | <b>16.34</b> | 2.951        | <b>18.61</b> | 3.735        | <b>24.43</b> | <b>3.741</b> | <b>18.68</b> | 3.461        | <b>19.75</b> | <b>3.424</b> | <b>20.56</b> | <b>3.689</b> |

| Sets    | H        |       |            |       |       |       | LE       |       |            |       |       |       |
|---------|----------|-------|------------|-------|-------|-------|----------|-------|------------|-------|-------|-------|
|         | Training |       | Validation |       | Test  |       | Training |       | Validation |       | Test  |       |
|         | RMSE     | MAE   | RMSE       | MAE   | RMES  | MAE   | RMSE     | MAE   | RMSE       | MAE   | RMES  | MAE   |
| SVM     | 20.79    | 2.853 | 20.35      | 2.724 | 25.22 | 3.682 | 24.47    | 2.991 | 21.01      | 3.156 | 19.49 | 3.344 |
| KNN     | 19.83    | 2.867 | 26.43      | 3.876 | 30.99 | 3.957 | 23.41    | 2.816 | 25.16      | 3.864 | 24.16 | 3.761 |
| XGBoost | 25.79    | 3.894 | 27.07      | 3.989 | 30.34 | 4.488 | 27.26    | 3.416 | 26.47      | 3.165 | 24.39 | 3.678 |
| LSTM    | 23.24    | 3.381 | 24.49      | 3.514 | 29.45 | 4.085 | 23.91    | 2.924 | 24.46      | 3.644 | 25.62 | 3.927 |



|                 |              |              |              |              |              |              |              |              |              |              |              |              |
|-----------------|--------------|--------------|--------------|--------------|--------------|--------------|--------------|--------------|--------------|--------------|--------------|--------------|
| GRU             | 22.37        | 3.513        | 23.53        | 3.155        | 29.61        | 3.796        | 19.73        | 2.916        | 21.49        | 3.661        | 21.18        | 3.498        |
| Transformer     | 15.36        | 2.486        | <b>16.54</b> | <b>2.665</b> | 23.26        | 2.966        | <b>17.69</b> | <b>2.851</b> | <b>18.68</b> | <b>2.973</b> | <b>19.06</b> | <b>2.982</b> |
| Transformer_CNN | <b>15.32</b> | <b>2.458</b> | 17.19        | 2.749        | <b>22.60</b> | <b>2.894</b> | 18.13        | 3.221        | 19.71        | 3.208        | 20.12        | 3.092        |

5. The generalizability of the results is unclear. Mainly several different meteorological variables are used as driving variables. Would these variables be available for other sites also? If no, the method cannot be generalized. It would be nice to see the model performance with different sets of predictor variables Say, if only surface temperature data are available as driving variable, how good would be the imputation?

These variables are applicable to other sites, though relying solely on surface temperature as the driving variable for imputation may not yield optimal results. However, it is uncommon for a site to have only surface temperature as the available variable. Below are the imputation results using Transformer\_CNN at the QOMS and SETORS sites (with the year 2012 as the test set), employing basic meteorological elements. These elements include single-layer air temperature, pressure, single-layer air humidity, single-layer wind speed, single-layer wind direction, site hourly average precipitation, ground net radiation, single-layer soil temperature, and single-layer soil moisture content.

| Sets            | QOMS  |      |                |       |      |                | SETORS |      |                |       |      |                |
|-----------------|-------|------|----------------|-------|------|----------------|--------|------|----------------|-------|------|----------------|
|                 | H     |      |                | LE    |      |                | H      |      |                | LE    |      |                |
|                 | RMSE  | MAE  | R <sup>2</sup> | RMSE  | MAE  | R <sup>2</sup> | RMSE   | MAE  | R <sup>2</sup> | RMSE  | MAE  | R <sup>2</sup> |
| Transformer     | 34.76 | 4.36 | 0.74           | 37.58 | 4.77 | 0.69           | 39.96  | 5.28 | 0.70           | 42.48 | 4.79 | 0.67           |
| Transformer_CNN | 29.34 | 3.44 | 0.83           | 30.25 | 3.93 | 0.78           | 31.66  | 4.83 | 0.80           | 34.22 | 4.61 | 0.79           |

### Other specific comments

72-73

Certainly, other machine learning methods (such as Random Forest) do not perform as well as deep learning techniques when dealing with complex time series data.

Reference:

Fawaz, H. I., Forestier, G., Weber, J., Idoumghar, L., & Muller, P.-A. (2019). Deep learning for time series classification: a review. *Data Mining and Knowledge Discovery*, 33(4), 917-963. DOI: 10.1007/s10618-019-00619-1

79-80

Reference

Vaswani, A., Shazeer, N.M., Parmar, N., Uszkoreit, J., Jones, L., Gomez, A.N., Kaiser, L., & Polosukhin, I. (2017). Attention is All you Need. *Neural Information Processing Systems*.

149-150

Given that this study focuses on the imputation effects regarding turbulent heat flux, we have limited our presentation to the missing rates of sensible and latent heat fluxes. Should there be a necessity, further supplementation can be conducted in subsequent research.

156

Given that this study focuses on the imputation effects regarding turbulent heat flux, we have limited our presentation to the missing rates of sensible and latent heat fluxes. Should there be a necessity, further supplementation can be provided in subsequent revisions.

160

$$\text{Gap\_filling value} = \frac{\sum_{i=1}^3 \frac{y_i}{d_i}}{\sum_{i=1}^3 \frac{1}{d_i}}$$

167

"Fit\_transform" is a function in Python.

170

Thank you for your valuable comments on my manuscript. My expression was not as clear and precise as it could have been, but the essence of what I intended to convey aligns with your understanding. Essentially, the K-NN imputation method leverages the proximity of data points in space or time to predict missing values, under the assumption that points closer to each other are more similar than those further apart. This approach is particularly suited for datasets characterized by local consistency, or when the data exhibit patterns that persist over short distances or time frames. This coincides with your observation that KNN is applicable when the correlation length scale is significantly larger than the distance between missing and available points, closely matching the scenario you described. We will make the necessary corrections in the revised version of our manuscript to clarify this point.

184

This was a clerical error in my manuscript, for which I sincerely apologize. I intend to correct this oversight in the revised submission

199

The objective is to use other meteorological elements as environmental drivers to impute these missing data, forming a complete heat flux dataset.

216

This was an error in my expression, for which I sincerely apologize. Please allow me the opportunity to make the following modification:

The Support Vector Machine (SVM) is versatile and can be applied not only as a linear classifier but also for non-linear classification through the use of kernel functions. Moreover, beyond its capability for classification, SVM can be adapted for regression tasks—known as Support Vector Regression (SVR). This approach aims to find an optimal hyperplane in a high-dimensional space that best fits the data points, thereby ensuring optimal regression performance. This versatility allows SVM to address both classification and regression problems effectively (Cortes and Vapnik, 1995).

225

Reference

Goodfellow, I., Bengio, Y., & Courville, A. (2016). Deep Learning. MIT Press.

228

Reference

Hochreiter, S., & Schmidhuber, J. (1997). Long short-term memory. *Neural computation*, 9(8), 1735-1780.

230

Reference

Cho, K., Van Merriënboer, B., Gulcehre, C., Bahdanau, D., Bougares, F., Schwenk, H., & Bengio, Y. (2014). Learning Phrase Representations using RNN Encoder–Decoder for Statistical Machine Translation. *Proceedings of the 2014 Conference on Empirical Methods in Natural Language Processing (EMNLP)*, 1724-1734.

240

Reference

Li, S., Jin, X., Xuan, Y., Zhou, X., Chen, W., Wang, Y. X., & Yan, X. (2019). Enhancing the Locality and Breaking the Memory Bottleneck of Transformer on Time Series Forecasting. *Advances in Neural Information Processing Systems (NeurIPS 2019)*.

242

Reference

Wu, N., Green, B., Ben, X., & O'Banion, S. (2020). Deep Transformer Models for Time Series Forecasting: The Influenza Prevalence Case. *arXiv preprint arXiv:2001.08317*.

244

Reference

Paszke, A., Gross, S., Massa, F., Lerer, A., Bradbury, J., Chanan, G., ... & Chintala, S. (2019). PyTorch: An Imperative Style, High-Performance Deep Learning Library. In *Advances in Neural Information Processing Systems (NeurIPS 2019)*.

245

This part is represented in the Feed-Forward section of the figure

249-251

This part is answered in major comment

255

In the Transformer\_CNN model, the initialization of weights and biases is designed to ensure the stability and efficiency of the model training process. Specifically, we adopted a variant of the He initialization method, a scientific approach to weight initialization frequently employed in deep learning models to improve convergence speed and stability during training.

The core idea of He initialization is to adjust the initial standard deviation of weights based on the number of nodes in the previous layer (i.e., `fan_in`). This initialization method is particularly crucial for the training of deep neural networks as it helps prevent issues of vanishing or exploding gradients, which often occur when traditional random weight initialization methods are used.

In the code, for each `nn.Linear` and `nn.Conv1d` layer, we first calculate `fan_in` and `fan_out`, then set the standard deviation of the weights based on the geometric mean of these two parameters:

```
fan_in, fan_out = nn.init._calculate_fan_in_and_fan_out(m.weight)
std = 1.0 / (fan_in + fan_out) ** 0.5
nn.init.normal_(m.weight, mean=0, std=std)
```

Moreover, if a bias is present, we initialize it to zero to avoid introducing additional bias at the beginning of training:

```
if m.bias is not None:
    nn.init.constant_(m.bias, 0)
```

This approach ensures that the initial values of the model weights are neither too large nor too small, facilitating faster convergence during the training process and enhancing the overall performance of the model.

265

This means that three different machine learning methods are applied to the three distinct sets of samples mentioned above (training set, validation set, and test set).

267

Yes, here we use B-O to select the parameters of the model to determine the best model.

269-272

The term "128 channels" refers to the dimension of the feature maps outputted by each convolutional layer. Here, "channel" does not denote the number of neurons, but rather a term commonly used in Convolutional Neural Networks (CNNs) to describe the depth or dimension of the output data at each layer.

Conv1d layers in the model are designed to process one-dimensional sequence data. These convolutional layers transform the input sequence into a series of feature maps, each representing a feature learned from the input data. The parameter `in_channels=1` indicates that the input data has a single channel (e.g., time series data), while `out_channels=128` signifies that these convolutional layers will generate 128 distinct feature maps. Each feature map represents a different feature or attribute of the input data. Together, these feature maps constitute the input for subsequent processing steps in the model. By increasing the number of output channels, the model is able to extract a richer and more diverse set of features from the original input, thereby enhancing its learning and representational capacity.

In my research, the mention of "128" actually refers to the 128 output channels obtained through the transformation by the model's initial convolutional layers. The purpose of this step is not to directly increase the amount of information in the original data—I fully concur with the viewpoint based on the data processing inequality, which states that it is impossible to create more information in the process. Instead, the aim of this transformation is to reorganize and extract useful information from the original data. Through the feature mappings generated by these convolutional layers, the model can more effectively recognize and utilize this information for subsequent learning and prediction tasks.

281

I experimented with various methods to optimize Long Short-Term Memory (LSTM) and Gated Recurrent Unit (GRU) models. Regrettably, their performance in data imputation was inferior to that of the Transformer model and even fell short compared to some traditional machine learning approaches. Consequently, I did not include their results in Figure 8. Based on these observations, I subsequently opted to employ the Transformer model, which demonstrated superior performance in data imputation tasks. This model was thus chosen as the foundation for our integrated model architecture.

295

RMSE and MAE are shown in Table 4.

358

The observed phenomenon is believed to stem from the concentration of values within the dataset, which predisposes the model, during training, to favor values with higher occurrences while neglecting periodic fluctuations inherent within the dataset. The integration of CNN with the Transformer architecture, on the other hand, accentuates the importance of periodic variations in the data, effectively mitigating this bias.

Once again, we sincerely appreciate your insightful comments, which have undoubtedly strengthened the quality of our work. We have made the necessary revisions based on your suggestions, and the improved manuscript now better meets the journal's requirements.

Best regards,

Sincerely

Quanzhe Hou, Zhiqiu Gao, Zexia Duan, and Minghui Yu

March 30, 2024
